# Supplementary material
Source: Springer Nature journal article supplement (https://www.springermedizin.de/resource/supplementary/12872_2013_701_MOESM1_ESM.pdf/9430676)
Supplement: MOESM1 [file 9430676]

**Total number of patients entering the study**

n = 108

referred for 24 hour Holter ECG because of ambiguous palpitations, dizziness or presyncope  
(84 by primary health care centre, 24 by hospital clinic)

**Excluded** n = 13

because of initial inappropriate inclusion: known arrhythmia (n = 8),  
syncope (n = 5)

24 hour Holter  
n = 95 (18 referred by hospital clinic)

Intermittent ECG 28 days  
n = 95 (18 referred by hospital clinic)

**AF**

Holter n = 2    Intermittent n = 9

**PSVT**

Holter n = 0    Intermittent n = 3

**AV-block II-III**

Holter n = 1    Intermittent n = 1
